# Supplementary material for: Coastal processes modify projections of some climate-driven stressors in the California Current System
Source: Copernicus journal article supplement (doi:10.5194/bg-18-2871-2021), 2021-05-11
Supplement: Supplementary file 1 [file bg-18-2871-2021-supplement.pdf]

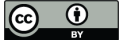

*Supplement of*

## **Coastal processes modify projections of some climate-driven stressors in the California Current System**

**Samantha A. Siedlecki et al.**

*Correspondence to:* Samantha A. Siedlecki ([samantha.siedlecki@uconn.edu](mailto:samantha.siedlecki@uconn.edu))

The copyright of individual parts of the supplement might differ from the article licence.

|                 | A.<br>CCS<br>(1<br>degree) | B.<br>CCS (12<br>km) | C.<br>N-CCS<br>(1 degree) | D.<br>N-CCS<br>(12km) | E.<br>N-CCS<br>(1.5km) |
|-----------------|----------------------------|----------------------|---------------------------|-----------------------|------------------------|
| <b>TA surf</b>  | -20.41                     | -7.88<br>-5.88*      | -26.01                    | -7.40<br>-6.29*       | -7.46<br>-10.53*       |
| <b>TA 200m</b>  | -8.90                      | 0.68<br>-3.10*       | -7.72                     | 1.91<br>-1.0*         | -3.05<br>-8.22*        |
| <b>TA bot</b>   | -10.38                     | -0.03<br>-1.90*      | -7.70                     | 1.00<br>0.28*         | -1.66<br>-4.17*        |
|                 |                            |                      |                           |                       |                        |
| <b>DIC surf</b> | 101.44                     | 93.32<br>91.65*      | 80.52                     | 89.93<br>91.26*       | 80.98<br>73.57*        |
| <b>DIC 200m</b> | 96.82                      | 103.24<br>94.35*     | 78.04                     | 89.49<br>91.74*       | 87.37<br>80.93*        |
| <b>DIC bot</b>  | 66.33                      | 75.25<br>92.51*      | 69.63                     | 79.92<br>83.93*       | 77.66<br>83.71*        |
|                 |                            |                      |                           |                       |                        |
| <b>PO4 surf</b> | -0.0561                    | -0.0727<br>-0.0754*  | -0.0403                   | -0.0732<br>-0.0802*   | N/A                    |
| <b>PO4 200m</b> | 0.0655                     | 0.0273<br>-0.0180*   | 0.0191                    | 0.0337<br>0.0062*     | N/A                    |
| <b>PO4 bot</b>  | -0.0064                    | 0.0112<br>0.0096*    | 0.0131                    | 0.0397<br>0.0342      | N/A                    |
|                 |                            |                      |                           |                       |                        |
| <b>NO3 surf</b> | -0.3216                    | -0.1869<br>-0.2831*  | -0.3449                   | -0.3247<br>-0.3678*   |                        |
| <b>NO3 200m</b> | 1.1383                     | 1.4705<br>0.5535*    | 0.8318                    | 1.2999<br>0.8426*     |                        |
| <b>NO3 bot</b>  | 0.6392                     | 0.6374<br>0.7061*    | 0.6833                    | 0.9136<br>0.8799*     |                        |

**Table S1: Annual average differences between climate stressor variables (all in mmol/m<sup>3</sup>) in the future and the base/modern conditions for the 1 degree, 12-km, and 1.5-km projections over different regions of the water column (200 m averaged, surface, and bottom < 500 m). Column A includes the global (1 degree) ensemble average difference for the CCS region followed by, in column B, the CCS wide difference from the 12km downscaled results. The N-CCS region results span columns C-E in this table. The next three columns detail the differences in the Cascadia domain for the global ensemble average (column C), the 12-km (column D) and 1.5-km downscaled projections (column E). Within the downscaled simulation, values are also provided just on the shelf (< 200 meter isobath) and denoted with an asterisk (\*) next to the number.**

|                                                                 | 200m avg | Surface       | Bottom (<500m) |
|-----------------------------------------------------------------|----------|---------------|----------------|
| $\Delta p\text{CO}_2$ ( $\mu\text{atm}$ ) & $\Delta\text{TA}$   | 0.94     | 0.19          | 0.92           |
| $\Delta p\text{CO}_2$ ( $\mu\text{atm}$ ) & $\Delta\text{DIC}$  | 0.04     | 0.34          | 0.99           |
| $\Delta p\text{CO}_2$ ( $\mu\text{atm}$ ) & $\Delta\text{NO}_3$ | 0.47     | 0.35          | 0.62           |
| $\Delta p\text{CO}_2$ ( $\mu\text{atm}$ ) & $\Delta\text{T}$    | 0.01     | 0.81          | 0.36           |
| $\Delta\text{pH}$ & $\Delta\text{TA}$                           | 0.04     | 0.74          | 0.59, $p=0.20$ |
| $\Delta\text{pH}$ & $\Delta\text{DIC}$                          | 0.001    | 0.81          | 0.28           |
| $\Delta\text{pH}$ & $\Delta\text{NO}_3$                         | 0.03     | 0.56, $p=0.3$ | 0.003          |
| $\Delta\text{pH}$ & $\Delta\text{T}$                            | 0.01     | -0.19         | 0.03           |
| $\Delta\Omega$ & $\text{TA}$                                    | 0.27     | -0.0009       | 0.66, $p=0.21$ |
| $\Delta\Omega$ & $\Delta\text{DIC}$                             | 0.25     | 0.99          | 0.71           |
| $\Delta\Omega$ & $\text{NO}_3$                                  | 0.0002   | 0.14          | 0.95           |
| $\Delta\Omega$ & $\text{T}$                                     | 0.24     | 0.22          | 0.002          |

**Table S2: We examine the relationship between the carbon variables that are modified in the downscaled simulations and the other variables representative of different processes. The  $R^2$  between the anomalies in Column C from Table 1 and either another variable within the same depth region in Table 1 or column B from Table S1 with values  $>0.5$  highlighted in grey. For example for the correlations between  $p\text{CO}_2$  and TA over the 200 m avg, the correlations are between the  $\Delta p\text{CO}_2$  in the 200 m avg section from Table 1 for the entire CCS region (column C) from the downscaled models and the TA from column B from Table S1 for the 200m row. All p values were less than 0.05 indicating significant correlations.**

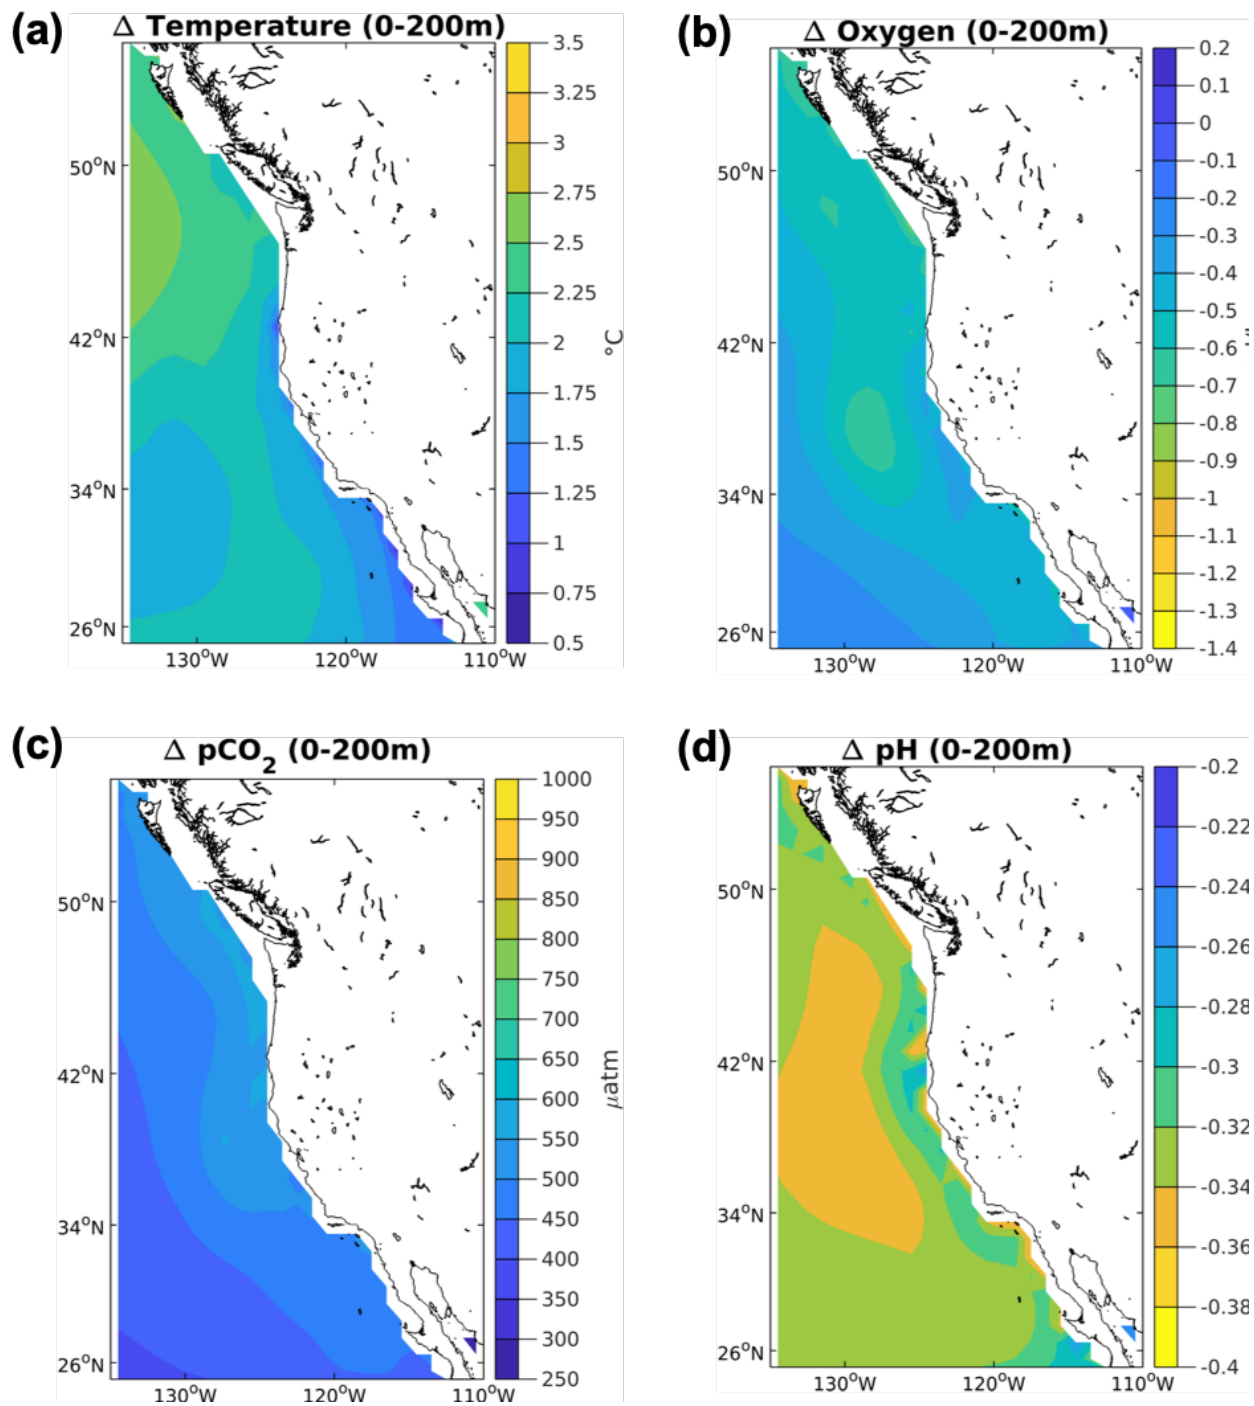

**Figure S1.** Global changes from the CMIP5 ensemble average for the CCS region - future minus base conditions (a) temperature (deg C) (b) O<sub>2</sub> (ml/l) (c) pCO<sub>2</sub> ( $\mu$ atm) (d) pH.

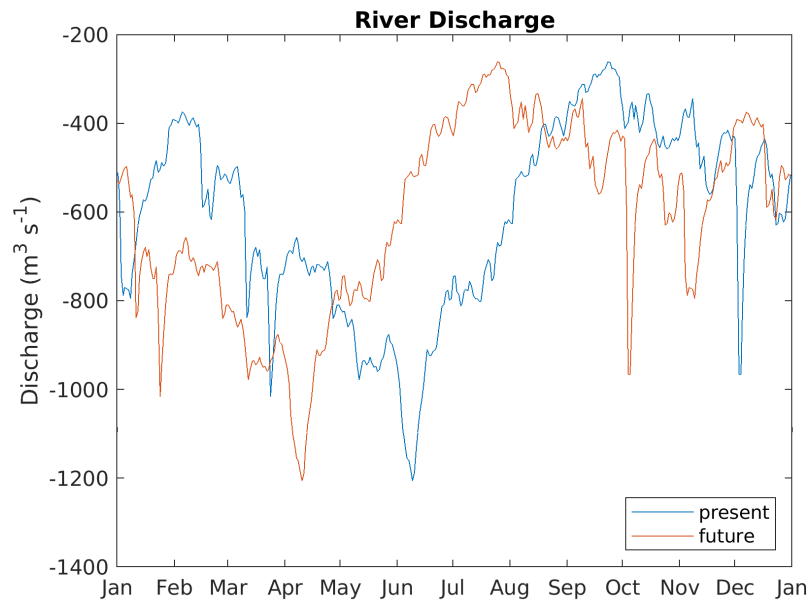

**Figure S2.** Freshwater discharge forcing for the 1.5 km simulation in the present and future simulations as described in the methods.
